# Supplementary material for: Global Trends in Typhoidal Salmonellosis: A Systematic Review
Source: PubMed Central journal article supplement (PMC6128363; doi:10.4269/ajtmh.18-0034), 2018-07-25
Supplement: tpmd180034.SD2.pdf [file tpmd180034.SD2.pdf]

## Appendix 2: Data Dictionary and Full- Text Exclusion Reasons



Appendix 2.2 Reason for exclusion at full-text screening phase

| <b>Exclusion Reason</b>                                                                                                 | <b>Number of Studies Excluded</b> |
|-------------------------------------------------------------------------------------------------------------------------|-----------------------------------|
| No relevant outcome data/rates                                                                                          | 425                               |
| Non-English Study                                                                                                       | 310                               |
| Data less than 18 months                                                                                                | 231                               |
| Duplicate                                                                                                               | 129                               |
| Review                                                                                                                  | 90                                |
| Developing country prior to 1990                                                                                        | 82                                |
| Other (Math model/Graph difficult to read/vaccination study without control/human challenge)                            | 54                                |
| Study duration Not Stated                                                                                               | 47                                |
| Full text not found-exhausted all methods                                                                               | 25                                |
| Not Peer-Reviewed                                                                                                       | 20                                |
| Special populations i.e. Travellers, Military groups, Cancer, HIV positive groups, Sickle Cell Anemia groups, Outbreaks | 16                                |
| Purely antimicrobial resistance reporting                                                                               | 13                                |
| Clinical case study/series                                                                                              | 11                                |
| Carrier Study                                                                                                           | 10                                |
| Excluded during synthesis                                                                                               | 296                               |
| <b>Total Excluded</b>                                                                                                   | <b>1759</b>                       |
