# Supplementary material for: Global Trends in Typhoidal Salmonellosis: A Systematic Review
Source: PubMed Central journal article supplement (PMC6128363; doi:10.4269/ajtmh.18-0034), 2018-07-25
Supplement: tpmd180034.SD3.pdf [file tpmd180034.SD3.pdf]

## Appendix 3: List of Included Studies

Appendix 3.1: Included Peer Reviewed Studies (Blood culture confirmed enteric fever)

| Author                                 | Year of Publication | Title                                                                                                                                                                                                              | Journal                                                                                                                  |
|----------------------------------------|---------------------|--------------------------------------------------------------------------------------------------------------------------------------------------------------------------------------------------------------------|--------------------------------------------------------------------------------------------------------------------------|
| Abdullah, F. E., et al.                | 2012                | Enteric fever in karachi: Current antibiotic susceptibility of salmonellae isolates                                                                                                                                | Journal of the College of Physicians and Surgeons Pakistan 22(3): 147-150.                                               |
| Abro, A. H., et al.                    | 2012                | Demographic and surgical evaluation of typhoid ileal perforation                                                                                                                                                   | Journal of Ayub Medical College, Abbottabad : JAMC 24(3-4): 87-89.                                                       |
| Abucejo, P. E., et al.                 | 2001                | Blood culture confirmed typhoid fever in a provincial hospital in the Philippines                                                                                                                                  | The Southeast Asian journal of tropical medicine and public health 32(3): 531-536.                                       |
| Aggarwal, A., et al.                   | 2007                | A three-year retrospective study on the prevalence, drug susceptibility pattern, and phage types of Salmonella enterica subspecies typhi and paratyphi in Christian Medical College and Hospital, Ludhiana, Punjab | Journal, Indian Academy of Clinical Medicine 8(1): 32-35.                                                                |
| Agu, K., et al.                        | 2014                | Prevalence, Morbidity, and Mortality Patterns of Typhoid Ileal Perforation as Seen at the University of Nigeria Teaching Hospital Enugu Nigeria: An 8-year Review                                                  | World Journal of Surgery 38(10): 2514-2518.                                                                              |
| Al-Emran, H. M., et al.                | 2016                | Validation and Identification of Invasive Salmonella Serotypes in Sub-Saharan Africa by Multiplex Polymerase Chain Reaction.                                                                                       | Clinical infectious diseases : an official publication of the Infectious Diseases Society of America 62 Suppl 1: S80-82. |
| Al-Emran, H. M., et al.                | 2016                | A Multicountry Molecular Analysis of Salmonella enterica Serovar Typhi With Reduced Susceptibility to Ciprofloxacin in Sub-Saharan Africa.                                                                         | Clinical infectious diseases : an official publication of the Infectious Diseases Society of America 62 Suppl 1: S42-46. |
| Ali, J. and Kebede, Y.                 | 2008                | Frequency of isolation and antimicrobial susceptibility pattern of bacterial isolates from blood culture, Gondar University teaching hospital, Northwest Ethiopia                                                  | Ethiopian medical journal 46(2): 155-161.                                                                                |
| Ali, M., et al.                        | 2011                | Impact of Vi vaccination on spatial patterns of typhoid fever in the slums of Kolkata, India                                                                                                                       | Vaccine 29(48): 9051-9056.                                                                                               |
| Al-Mofleh, I.A., et al.                | 1990                | Fever of unknown origin: Experience in Riyadh, Saudi Arabia                                                                                                                                                        | Annals of Saudi Medicine 10(6): 620-625.                                                                                 |
| Anonymous                              | 1920                | Typhoid in the Large Cities of the United States in 1919                                                                                                                                                           | JAMA 72(10): 672-675.                                                                                                    |
| Aseffa, A., et al.                     | 1997                | Antibiotic resistance of prevalent salmonella and shigella strains in northwest Ethiopia                                                                                                                           | East African Medical Journal 74(11): 708-713.                                                                            |
| Bajracharya, D., et al.                | 2014                | 25 Years after Vi Typhoid Vaccine Efficacy Study, Typhoid Affects Significant Number of Population in Nepal                                                                                                        | PLoS ONE [Electronic Resource] 9(1).                                                                                     |
| Bhattacharya, S.S., et al.             | 2003                | A steady decrease in occurrence of Salmonella typhi infection in Rourkela, Orissa                                                                                                                                  | Indian Journal of Pathology and Microbiology 46(3): 498-500.                                                             |
| Bhutta, Z.A.                           | 1996                | Therapeutic aspects of typhoidal salmonellosis in childhood: The Karachi experience                                                                                                                                | Annals of Tropical Paediatrics 16(4): 299-306.                                                                           |
| Biggs, H.M., et al.                    | 2013                | Invasive Salmonella infections in areas of high and low Malaria transmission intensity in Tanzania                                                                                                                 | Clinical Infectious Diseases 58(5): 638-647.                                                                             |
| Blacksell, S.D., et al.                | 2007                | Serological and blood culture investigations of Nepalese fever patients                                                                                                                                            | Transactions of the Royal Society of Tropical Medicine and Hygiene 101(7): 686-690.                                      |
| Breiman, R.F., et al.                  | 2012                | Population-based incidence of typhoid fever in an urban informal settlement and a rural area in Kenya: implications for typhoid vaccine use in Africa                                                              | PLoS ONE [Electronic Resource] 7(1).                                                                                     |
| Butt, T., et al.                       | 2005                | Changing trends in drug resistance among typhoid salmonellae in Rawalpindi, Pakistan                                                                                                                               | Eastern Mediterranean Health Journal 11(5-6): 1038-1044.                                                                 |
| Chansamouth, V., et al.                | 2016                | The Aetiologies and Impact of Fever in Pregnant Inpatients in Vientiane, Laos                                                                                                                                      | PLoS Negl Trop Dis. 2016 Apr 6;10(4):e0004577. doi: 10.1371/journal.pntd.0004577. eCollection 2016 Apr.                  |
| Cheng, A.F.B., et al.                  | 1991                | A five-year prospective study of septicaemia in hospitalized children in Hong Kong                                                                                                                                 | Journal of Tropical Medicine and Hygiene 94(5): 295-303.                                                                 |
| Chiedozie Kingsley, O., et al.         | 2013                | Bacteriologic profile and antibiotics susceptibility pattern of suspected septicaemic patients in Uyo, Nigeria                                                                                                     | Research Journal of Medical Sciences 7(2): 35-39.                                                                        |
| Ciftci, E., et al.                     | 2004                | Salmonella bacteraemia in Turkish children: 37 cases seen in a university hospital between 1993 and 2002                                                                                                           | Annals of Tropical Paediatrics 24(1): 75-80.                                                                             |
| Condran, G.A. and Crimmins-Gardner, E. | 1978                | Public health measures and mortality in US cities in the late nineteenth century                                                                                                                                   | Human Ecology 6(1): 27-54.                                                                                               |
| Cruz Espinoza, L. M., et al.           | 2016                | Variations of Invasive Salmonella Infections by Population Size in Asante Akim North Municipal, Ghana.                                                                                                             | Clinical infectious diseases : an official publication of the Infectious Diseases Society of America 62 Suppl 1: S17-22. |
| Daoud, A.S., et al.                    | 1991                | Clinical presentation of enteric fever: its changing pattern in Kuwait                                                                                                                                             | Journal of Tropical Medicine and Hygiene 94(5): 341-347.                                                                 |
| Dave, J., et al.                       | 2015                | East London experience with enteric fever 2007-2012                                                                                                                                                                | PloS one 10(3).                                                                                                          |
| Dimitrov, T.S., et al.                 | 2005                | Incidence of bloodstream infections in a speciality hospital in Kuwait: 8-year experience                                                                                                                          | Medical Principles and Practice 14(6): 417-421.                                                                          |
| Edino, S.T., et al.                    | 2004                | Typhoid enteric perforation in north western Nigeria                                                                                                                                                               | Nigerian journal of medicine : journal of the National Association of Resident Doctors of Nigeria 13(4): 345-349.        |
| Eibach, D., et al.                     | 2016                | The Emergence of Reduced Ciprofloxacin Susceptibility in Salmonella enterica Causing Bloodstream Infections in Rural Ghana.                                                                                        | Clinical infectious diseases : an official publication of the Infectious Diseases Society of America 62 Suppl 1: S32-36. |
| Eni, U.E. and Gali, B.M.               | 2007                | Aetiology, management and outcome of entero-cutaneous fistula in Maiduguri, Nigeria                                                                                                                                | Nigerian journal of clinical practice 10(1): 47-51.                                                                      |

| Author                        | Year of Publication | Title                                                                                                                                                                      | Journal                                                                                                                                                                                                                                                                           |
|-------------------------------|---------------------|----------------------------------------------------------------------------------------------------------------------------------------------------------------------------|-----------------------------------------------------------------------------------------------------------------------------------------------------------------------------------------------------------------------------------------------------------------------------------|
| Fashae, K., et al.            | 2010                | Antimicrobial susceptibility and serovars of Salmonella from chickens and humans in Ibadan, Nigeria                                                                        | Journal of infection in developing countries 4(8): 484-494.                                                                                                                                                                                                                       |
| Feasey, N.A., et al.          | 2015                | Three epidemics of invasive multidrug-resistant salmonella bloodstream infection in Blantyre, Malawi, 1998-2014                                                            | Clinical Infectious Diseases 61(pp S363-S371).                                                                                                                                                                                                                                    |
| Feasey, N.A., et al.          | 2010                | Typhoid fever and invasive nontyphoid salmonellosis, Malawi and South Africa                                                                                               | Emerging Infectious Diseases 16(9): 1448-1451.                                                                                                                                                                                                                                    |
| Feasey, N.A., et al.          | 2015                | Rapid Emergence of Multidrug Resistant, H58-Lineage Salmonella Typhi in Blantyre, Malawi                                                                                   | PLoS Neglected Tropical Diseases 9(4).                                                                                                                                                                                                                                            |
| Fuerst, H.T.                  | 1964                | The epidemiology of salmonella infections in the city of New York                                                                                                          | Bulletin of the New York Academy of Medicine 40(12): 948-960.                                                                                                                                                                                                                     |
| Gandra, S., et al.            | 2015                | Trends in antibiotic resistance among bacteria isolated from blood cultures using a large private laboratory network data in India: 2008- 2014                             | Antimicrobial Resistance and Infection Control Conference: 3rd International Conference on Prevention and Infection Control, ICPIC 2015 Geneva Switzerland. Conference Start: 20150616 Conference End: 20150619. Conference Publication: (var.pagings). 20150614 (no pagination). |
| Ganesh, R., et al.            | 2010                | Profile of Typhoid Fever in Children from a Tertiary Care Hospital in Chennai, South India                                                                                 | Indian J Pediatr 77(10): 1089-1092.                                                                                                                                                                                                                                               |
| Gautam, V., et al.            | 2002                | Sensitivity patterns of Salmonella serotypes in Northern India                                                                                                             | The Brazilian journal of infectious diseases : an official publication of the Brazilian Society of Infectious Diseases 6(6): 281-287.                                                                                                                                             |
| Geetha, V.K., et al.          | 2014                | Plasmid-mediated quinolone resistance in typhoidal Salmonellae: a preliminary report from South India                                                                      | Indian J Med Microbiol 32(1): 31-34.                                                                                                                                                                                                                                              |
| Guha, S., et al.              | 2005                | Salmonella bacteraemia in Pokhara: emergence of antibiotic resistance                                                                                                      | Nepal Medical College journal : NMCJ 7(1): 23-25.                                                                                                                                                                                                                                 |
| Hafiz, S., et al.             | 1993                | Epidemiology of salmonellosis and its sensitivity in Karachi                                                                                                               | JPMA Journal of the Pakistan Medical Association 43(9): 178-179.                                                                                                                                                                                                                  |
| Herva, E., et al.             | 1999                | Establishing a laboratory for surveillance of invasive bacterial infections in a tertiary care government hospital in a rural province in The Philippines                  | American Journal of Tropical Medicine and Hygiene 60(6): 1035-1040.                                                                                                                                                                                                               |
| Jain, S. and Das Chugh, T.    | 2013                | Antimicrobial resistance among blood culture isolates of Salmonella enterica in New Delhi.                                                                                 | Journal of infection in developing countries 7(11): 788-795.                                                                                                                                                                                                                      |
| Kalonji, L.M., et al.         | 2015                | Invasive salmonella infections at multiple surveillance sites in the Democratic Republic of the Congo, 2011-2014                                                           | Clinical Infectious Diseases 61(pp S346-S353).                                                                                                                                                                                                                                    |
| Kanoksil, M., et al.          | 2013                | Epidemiology, Microbiology and Mortality Associated with Community-Acquired Bacteremia in Northeast Thailand: A Multicenter Surveillance Study                             | PloS one 8(1).                                                                                                                                                                                                                                                                    |
| Karkey, A., et al.            | 2010                | The burden and characteristics of enteric fever at a healthcare facility in a densely populated area of Kathmandu                                                          | PloS one 5(11).                                                                                                                                                                                                                                                                   |
| Kasper, M.R., et al.          | 2012                | Infectious etiologies of acute febrile illness among patients seeking health care in South-Central Cambodia                                                                | American Journal of Tropical Medicine and Hygiene 86(2): 246-253.                                                                                                                                                                                                                 |
| Kelly, D.F., et al.           | 2011                | The burden of vaccine-preventable invasive bacterial infections and pneumonia in children admitted to hospital in urban Nepal                                              | International Journal of Infectious Diseases 15(1): e17-e23.                                                                                                                                                                                                                      |
| Khan, M.I., et al.            | 2012                | Risk factors associated with typhoid fever in children aged 2-16 years in Karachi, Pakistan                                                                                | Epidemiology and Infection 140(4): 665-672.                                                                                                                                                                                                                                       |
| Khan, M.I., et al.            | 2012                | Effectiveness of Vi capsular polysaccharide typhoid vaccine among children: a cluster randomized trial in Karachi, Pakistan                                                | Vaccine 30(36): 5389-5395.                                                                                                                                                                                                                                                        |
| Khan, M.I., et al.            | 2012                | Epidemiology, clinical presentation, and patterns of drug resistance of Salmonella Typhi in Karachi, Pakistan                                                              | Journal of infection in developing countries 6(10): 704-714.                                                                                                                                                                                                                      |
| Kharbanda, P., et al.         | 2013                | Changing antimicrobial susceptibility of Salmonella isolates: A retrospective study of 3 year (2008-2010) from a tertiary care hospital                                    | Journal of Pure and Applied Microbiology 7(2): 1455-1456.                                                                                                                                                                                                                         |
| Kouame, J., et al.            | 2004                | Typhoid ileal perforation surgical experience of 64 cases                                                                                                                  | Acta Chirurgica Belgica 104(4): 445-447.                                                                                                                                                                                                                                          |
| Kuchuloria, T., et al.        | 2016                | Hospital-Based Surveillance for Infectious Etiologies among Patients with Acute Febrile Illness in Georgia, 2008-2011                                                      | Am. J. Trop. Med. Hyg., 94(1), 2016, pp. 236-242                                                                                                                                                                                                                                  |
| Labi, A.K., et al.            | 2014                | Salmonella blood stream infections in a tertiary care setting in Ghana                                                                                                     | BMC infectious diseases 14.                                                                                                                                                                                                                                                       |
| Laupland, K.B., et al.        | 2010                | Salmonella enterica bacteraemia: a multi-national population-based cohort study                                                                                            | BMC infectious diseases 10.                                                                                                                                                                                                                                                       |
| Leelarasamee, A., et al.      | 2004                | Etiologies of acute undifferentiated febrile illness in Thailand                                                                                                           | Journal of the Medical Association of Thailand 87(5): 464-472.                                                                                                                                                                                                                    |
| Limpitkul, W., et al.         | 2014                | Typhoid outbreak in Songkhla, Thailand 2009-2011: clinical outcomes, susceptibility patterns, and reliability of serology tests.                                           | PloS one 9(11): e111768.                                                                                                                                                                                                                                                          |
| Lin, F.Y.C., et al.           | 2001                | The efficacy of a Salmonella typhi Vi conjugate vaccine in two-to-five-year-old children                                                                                   | New England Journal of Medicine 344(17): 1263-1269.                                                                                                                                                                                                                               |
| Lunguya, O., et al.           | 2012                | Salmonella typhi in the democratic republic of the Congo: fluoroquinolone decreased susceptibility on the rise                                                             | PLoS Neglected Tropical Diseases 6(11).                                                                                                                                                                                                                                           |
| Lunguya, O., et al.           | 2012                | The diagnosis of typhoid fever in the Democratic Republic of the Congo                                                                                                     | Transactions of the Royal Society of Tropical Medicine and Hygiene 106(6): 348-355.                                                                                                                                                                                               |
| Mandomando, I., et al.        | 2015                | Invasive salmonella infections among children from Rural Mozambique, 2001-2014                                                                                             | Clinical Infectious Diseases 61(pp S339-S345).                                                                                                                                                                                                                                    |
| Maskey, A.P., et al.          | 2008                | Emerging trends in enteric fever in Nepal: 9124 cases confirmed by blood culture 1993-2003                                                                                 | Transactions of the Royal Society of Tropical Medicine and Hygiene 102(1): 91- 95.                                                                                                                                                                                                |
| Mayanja, B.N., et al.         | 2010                | Septicaemia in a population-based HIV clinical cohort in rural Uganda, 1996-2007: incidence, aetiology, antimicrobial drug resistance and impact of antiretroviral therapy | Tropical Medicine & International Health 15(6): 697-705.                                                                                                                                                                                                                          |
| Meier, D.E. and Tarpley, J.L. | 1998                | Typhoid intestinal perforations in Nigerian children                                                                                                                       | World Journal of Surgery 22(3): 319-323.                                                                                                                                                                                                                                          |
| Meltzer, E., et al.           | 2006                | Epidemiology and clinical aspects of enteric fever in Israel                                                                                                               | American Journal of Tropical Medicine and Hygiene 74(4): 540-545.                                                                                                                                                                                                                 |
| Menezes, G.A., et al.         | 2012                | Antimicrobial resistance trends in blood culture positive Salmonella Typhi isolates from Pondicherry, India, 2005-2009                                                     | Clinical Microbiology and Infection 18(3): 239-245.                                                                                                                                                                                                                               |
| Mouaket, A.E., et al.         | 1990                | Prolonged unexplained pyrexia: A review of 221 paediatric cases from Kuwait                                                                                                | Infection 18(4): 226-229.                                                                                                                                                                                                                                                         |



| Author                              | Year of Publication | Title                                                                                                                                                         | Journal                                                                                |
|-------------------------------------|---------------------|---------------------------------------------------------------------------------------------------------------------------------------------------------------|----------------------------------------------------------------------------------------|
| Mutanda,L.N.,et al.                 | 1998                | Selected laboratory tests in febrile patients in Kampala, Uganda                                                                                              | East African Medical Journal 75(2): 68-72.                                             |
| Muthumbi,E., et al.                 | 2015                | Invasive Salmonellosis in Kilifi, Kenya                                                                                                                       | Clinical Infectious Diseases 61 Suppl 4: S290-301.                                     |
| Neilsen, M.V., et al.               | 2012                | Incidence and characteristics of bacteremia among children in rural Ghana                                                                                     | PloS one 7(9).                                                                         |
| Ng, S.Y. and Leong,K.W.             | 1955                | Typhoid fever in Singapore                                                                                                                                    | Proc Alumni. Ass. Malaya 8(3): 183-189.                                                |
| Obaro,S.K., et al.                  | 2015                | Salmonella bacteremia among children in central and Northwest Nigeria, 2008-2015                                                                              | Clinical Infectious Diseases 61(pp S325-S331).                                         |
| Ochiai, R.L., et al.                | 2008                | A study of typhoid fever in five Asian countries: Disease burden and implications for controls                                                                | Bulletin of the World Health Organization 86(4): 260-268.                              |
| Phoba, M.F., et al.                 | 2014                | Epidemic increase in Salmonella bloodstream infection in children, Bwamanda, the Democratic Republic of Congo                                                 | European Journal of Clinical Microbiology & Infectious Diseases 33(1): 79-87.          |
| Prasad, K.J., et al.                | 2015                | Comparative evaluation of two rapid Salmonella-IgM tests and blood culture in the diagnosis of enteric fever                                                  | Indian Journal of Medical Microbiology 33(2): 237-242.                                 |
| Ravikumar,K., et al.                | 2006                | A two-year epidemiological study on enteric fever caused by salmonella sp from Tamil Nadu, South India                                                        | Asian Journal of Microbiology, Biotechnology and Environmental Sciences 8(4): 795-797. |
| Raza, A., et al.                    | 2014                | Salmonella bacteraemia among healthcare workers and their dependents                                                                                          | Journal of the Pakistan Medical Association 64(7): 748-750.                            |
| Saha, M.R., et al.                  | 2002                | Decreasing trend in the occurrence of salmonella enterica serotype typhi amongst hospitalised children in Kolkata, India during 1990-2000                     | Indian Journal of Medical Research 115(FEB.): 46-48.                                   |
| Saha, M.R., et al.                  | 2003                | A note on incidence of typhoid fever in diverse age groups in Kolkata, India                                                                                  | Japanese Journal of Infectious Diseases 56(3): 121-122.                                |
| Saha, S.K., et al.                  | 2001                | Typhoid fever in Bangladesh: implications for vaccination policy                                                                                              | Pediatric Infectious Disease Journal 20(5): 521-524.                                   |
| Schwarz, N.G., et al.               | 2010                | Systemic bacteraemia in children presenting with clinical pneumonia and the impact of non- typhoid salmonella (NTS)                                           | BMC infectious diseases 10.                                                            |
| Sharma, N.P., et al.                | 2006                | A hospital-based study of bloodstream infections in febrile patients in Dhulikhel Hospital Kathmandu University Teaching Hospital, Nepal                      | Southeast Asian Journal of Tropical Medicine and Public Health 37(2): 351-356.         |
| Siddiqui, F.J., et al.              | 2006                | Typhoid fever in children: some epidemiological considerations from Karachi, Pakistan                                                                         | International Journal of Infectious Diseases 10(3): 215-222.                           |
| Singh, D.S., et al.                 | 2012                | Enteric fever in children at Dhulikhel hospital                                                                                                               | Journal of Nepal Paediatric Society 32(3): 216-220.                                    |
| Sridhar, C.B. and Kulkarni, R.D.    | 1995                | Reassessment of frequency of occurrence of typhoid fever and cost efficacy analysis of antibiotic therapy                                                     | The Journal of the Association of Physicians of India 43(10): 679-684.                 |
| Stephen, J.M., et al.               | 2003                | Salmonella bloodstream infections: report from the SENTRY Antimicrobial Surveillance Program (1997-2001)                                                      | International Journal of Antimicrobial Agents 22(4): 395-405.                          |
| Stoesser, N., et al.                | 2013                | Pediatric bloodstream infections in Cambodia, 2007 to 2011                                                                                                    | Pediatric Infectious Disease Journal 32(7): e272-e276.                                 |
| Sur, D., et al.                     | 2009                | A cluster-randomized effectiveness trial of vi typhoid vaccine in India                                                                                       | New England Journal of Medicine 361(4): 335-344.                                       |
| Talpur, A.A., et al.                | 2012                | Sensitivity pattern of salmonella typhi in patients with typhoid small bowel perforations                                                                     | Medical Channel 19(2): 93-96.                                                          |
| Tankhiwale, S. S., et al.           | 2003                | An unusually high occurrence of Salmonella enterica serotype Paratyphi A in patients with enteric fever                                                       | Indian Journal of Medical Research 117: 10-12.                                         |
| Thriemer,K., et al.                 | 2012                | The Burden of Invasive Bacterial Infections in Pemba, Zanzibar                                                                                                | PloS one 7(2).                                                                         |
| Vlieghe,E.R., et al.                | 2013                | Bloodstream Infection among Adults in Phnom Penh, Cambodia: Key Pathogens and Resistance Patterns                                                             | PloS one 8(3).                                                                         |
| Walia, M., et al.                   | 2006                | Age-related clinical and microbiological characteristics of enteric fever in India                                                                            | Transactions of the Royal Society of Tropical Medicine and Hygiene 100(10): 942-948.   |
| Walters, M.S., et al.               | 2014                | Shifts in Geographic Distribution and Antimicrobial Resistance during a Prolonged Typhoid Fever Outbreak - Bundibugyo and Kasese Districts, Uganda, 2009-2011 | PLoS Neglected Tropical Diseases 8(3).                                                 |
| Wongsawat, J., et al.               | 2002                | Typhoid fever in children: Experience in King Chulalongkorn Memorial Hospital                                                                                 | Journal of the Medical Association of Thailand 85(12): 1247-1250.                      |
| Yashavanth, R. and Vidyalakshmi, K. | 2010                | The Re-Emergence of chloramphenicol sensitivity among enteric fever pathogens in Mangalore                                                                    | Journal of Clinical and Diagnostic Research 4(5): 3016-3108.                           |

## Appendix 3.2: Included Surveillance Reports

| Author          | Year of Publication | Title                                                          | Journal                                                                                          | Country      | Level of reporting |
|-----------------|---------------------|----------------------------------------------------------------|--------------------------------------------------------------------------------------------------|--------------|--------------------|
| Keddy           | 2007                | GERMS- South Africa Annual Report 2006                         | National Institute for Communicable Diseases                                                     | South Africa | country-wide       |
| Cohen           | 2008                | GERMS- South Africa Annual Report 2007                         | National Institute for Communicable Diseases                                                     | South Africa | country-wide       |
| Cohen           | 2009                | GERMS- South Africa Annual Report 2008                         | National Institute for Communicable Diseases                                                     | South Africa | country-wide       |
| Crowther        | 2010                | GERMS- South Africa Annual Report 2009                         | National Institute for Communicable Diseases                                                     | South Africa | country-wide       |
| Crowther        | 2011                | GERMS- South Africa Annual Report 2010                         | National Institute for Communicable Diseases                                                     | South Africa | country-wide       |
| Crowther-Gibson | 2012                | GERMS- South Africa Annual Report 2011                         | National Institute for Communicable Diseases                                                     | South Africa | country-wide       |
| Eramus          | 2013                | GERMS- South Africa Annual Report 2012                         | National Institute for Communicable Diseases                                                     | South Africa | country-wide       |
| Crowther-Gibson | 2014                | GERMS- South Africa Annual Report 2013                         | National Institute for Communicable Diseases                                                     | South Africa | country-wide       |
| Keddy           | 2006                | Communicable Diseases Surveillance Bulletin January 2005       | National Institute for Communicable Diseases                                                     | South Africa | country-wide       |
| Keddy           | 2007                | Communicable Diseases Surveillance Bulletin March 2006         | National Institute for Communicable Diseases                                                     | South Africa | country-wide       |
| Keddy           | 2015                | Communicable Diseases Surveillance Bulletin April 2015         | National Institute for Communicable Diseases                                                     | South Africa | country-wide       |
| Rios            | 2015                | Boletín Epidemiológico Trimestral Enero a Marzo de 2015- Chile | Boletín Epidemiológico Trimestral                                                                | Chile        | country-wide       |
| Palihawadana    | 2015                | Typhoid Vaccination Situation in Sri Lanka                     | Ministry of Health, Sri Lanka                                                                    | Sri Lanka    | country-wide       |
| MOH-NEPAL       | 2009                | Annual Report- Department of Health Services 2009-2010         | Government of Nepal, Ministry of Health and Population, Department of Health Services, Kathmandu | Nepal        | country-wide       |
| MOH-NEPAL       | 2010                | Annual Report- Department of Health Services 2010-2011         | Government of Nepal, Ministry of Health and Population, Department of Health Services, Kathmandu | Nepal        | country-wide       |
| MOH-NEPAL       | 2011                | Annual Report- Department of Health Services 2011-2012         | Government of Nepal, Ministry of Health and Population, Department of Health Services, Kathmandu | Nepal        | country-wide       |
| MOH-NEPAL       | 2012                | Annual Report- Department of Health Services 2012-2013         | Government of Nepal, Ministry of Health and Population, Department of Health Services, Kathmandu | Nepal        | country-wide       |
| MOH-NEPAL       | 2013                | Annual Report- Department of Health Services 2013-2014         | Government of Nepal, Ministry of Health and Population, Department of Health Services, Kathmandu | Nepal        | country-wide       |
| WHO-IRAQ        | 2008                | Integrated Control of Communicable Diseases                    | WHO                                                                                              | Iraq         | country-wide       |
| MOH-BAHRAIN     | 2001                | Health Statistics Report 2000                                  | Health Information Directorate                                                                   | Bahrain      | country-wide       |
| MOH-BAHRAIN     | 2002                | Health Statistics Report 2001                                  | Health Information Directorate                                                                   | Bahrain      | country-wide       |
| MOH-BAHRAIN     | 2003                | Health Statistics Report 2002                                  | Health Information Directorate                                                                   | Bahrain      | country-wide       |
| MOH-BAHRAIN     | 2004                | Health Statistics Report 2003                                  | Health Information Directorate                                                                   | Bahrain      | country-wide       |
| MOH-BAHRAIN     | 2005                | Health Statistics Report 2004                                  | Health Information Directorate                                                                   | Bahrain      | country-wide       |
| MOH-BAHRAIN     | 2006                | Health Statistics Report 2005                                  | Health Information Directorate                                                                   | Bahrain      | country-wide       |
| MOH-BAHRAIN     | 2007                | Health Statistics Report 2006                                  | Health Information Directorate                                                                   | Bahrain      | country-wide       |
| MOH-BAHRAIN     | 2008                | Health Statistics Report 2007                                  | Health Information Directorate                                                                   | Bahrain      | country-wide       |
| MOH-BAHRAIN     | 2009                | Health Statistics Report 2008                                  | Health Information Directorate                                                                   | Bahrain      | country-wide       |
| MOH-BAHRAIN     | 2010                | Health Statistics Report 2009                                  | Health Information Directorate                                                                   | Bahrain      | country-wide       |
| MOH-BAHRAIN     | 2011                | Health Statistics Report 2010                                  | Health Information Directorate                                                                   | Bahrain      | country-wide       |
| MOH-BAHRAIN     | 2012                | Health Statistics Report 2011                                  | Health Information Directorate                                                                   | Bahrain      | country-wide       |
| MOH-BAHRAIN     | 2013                | Health Statistics Report 2012                                  | Health Information Directorate                                                                   | Bahrain      | country-wide       |
| MOH-BAHRAIN     | 2014                | Health Statistics Report 2013                                  | Health Information Directorate                                                                   | Bahrain      | country-wide       |
| MOH-GHANA       | 2007                | GHS Facts and Figures 2007                                     | MOH-GHANA                                                                                        | Ghana        | country-wide       |
| MOH-GHANA       | 2010                | GHS Facts and Figures 2010                                     | MOH-GHANA                                                                                        | Ghana        | country-wide       |
| MOH-QATAR       | 1981                | Annual Report 1981                                             | MOH-QATAR                                                                                        | Qatar        | country-wide       |
| MOH-QATAR       | 1982                | Annual Report 1982                                             | MOH-QATAR                                                                                        | Qatar        | country-wide       |
| MOH-QATAR       | 1983                | Annual Report 1983                                             | MOH-QATAR                                                                                        | Qatar        | country-wide       |
| MOH-QATAR       | 1984                | Annual Report 1984                                             | MOH-QATAR                                                                                        | Qatar        | country-wide       |
| MOH-QATAR       | 1985                | Annual Report 1985                                             | MOH-QATAR                                                                                        | Qatar        | country-wide       |
| MOH-QATAR       | 1986                | Annual Report 1986                                             | MOH-QATAR                                                                                        | Qatar        | country-wide       |
| MOH-QATAR       | 1987                | Annual Report 1987                                             | MOH-QATAR                                                                                        | Qatar        | country-wide       |
| MOH-QATAR       | 1988                | Annual Report 1988                                             | MOH-QATAR                                                                                        | Qatar        | country-wide       |
| MOH-QATAR       | 1989                | Annual Report 1989                                             | MOH-QATAR                                                                                        | Qatar        | country-wide       |
| MOH-QATAR       | 1990                | Annual Report 1990                                             | MOH-QATAR                                                                                        | Qatar        | country-wide       |
| MOH-QATAR       | 1991                | Annual Report 1991                                             | MOH-QATAR                                                                                        | Qatar        | country-wide       |
| MOH-QATAR       | 1992                | Annual Report 1992                                             | MOH-QATAR                                                                                        | Qatar        | country-wide       |
| MOH-QATAR       | 1993                | Annual Report 1993                                             | MOH-QATAR                                                                                        | Qatar        | country-wide       |
| MOH-QATAR       | 1994                | Annual Report 1994                                             | MOH-QATAR                                                                                        | Qatar        | country-wide       |
| MOH-QATAR       | 1995                | Annual Report 1995                                             | MOH-QATAR                                                                                        | Qatar        | country-wide       |
| MOH-QATAR       | 1996                | Annual Report 1996                                             | MOH-QATAR                                                                                        | Qatar        | country-wide       |
| MOH-QATAR       | 1997                | Annual Report 1997                                             | MOH-QATAR                                                                                        | Qatar        | country-wide       |
| MOH-QATAR       | 1998                | Annual Report 1998                                             | MOH-QATAR                                                                                        | Qatar        | country-wide       |
| MOH-QATAR       | 1999                | Annual Report 1999                                             | MOH-QATAR                                                                                        | Qatar        | country-wide       |
| MOH-QATAR       | 2000                | Annual Report 2000                                             | MOH-QATAR                                                                                        | Qatar        | country-wide       |
| MOH-QATAR       | 2001                | Annual Report 2001                                             | MOH-QATAR                                                                                        | Qatar        | country-wide       |
| MOH-QATAR       | 2002                | Annual Report 2002                                             | MOH-QATAR                                                                                        | Qatar        | country-wide       |
| MOH-QATAR       | 2003                | Annual Report 2003                                             | MOH-QATAR                                                                                        | Qatar        | country-wide       |
| MOH-QATAR       | 2004                | Annual Report 2004                                             | MOH-QATAR                                                                                        | Qatar        | country-wide       |
| MOH-QATAR       | 2005                | Annual Report 2005                                             | MOH-QATAR                                                                                        | Qatar        | country-wide       |
| MOH-QATAR       | 2006                | Annual Report 2006                                             | MOH-QATAR                                                                                        | Qatar        | country-wide       |
| MOH-QATAR       | 2007                | Annual Report 2007                                             | MOH-QATAR                                                                                        | Qatar        | country-wide       |
| MOH-QATAR       | 2008                | Annual Report 2008                                             | MOH-QATAR                                                                                        | Qatar        | country-wide       |



| Author                      | Year of Publication | Title                                                                                  | Journal                                                                                     | Country       | Level of reporting |
|-----------------------------|---------------------|----------------------------------------------------------------------------------------|---------------------------------------------------------------------------------------------|---------------|--------------------|
| MOH-QATAR                   | 2009                | Annual Report 2009                                                                     | MOH-QATAR                                                                                   | Qatar         | country-wide       |
| MOH-QATAR                   | 2010                | Annual Report 2010                                                                     | MOH-QATAR                                                                                   | Qatar         | country-wide       |
| MOH-QATAR                   | 2011                | Annual Report 2011                                                                     | MOH-QATAR                                                                                   | Qatar         | country-wide       |
| MOH-QATAR                   | 2012                | Annual Report 2012                                                                     | MOH-QATAR                                                                                   | Qatar         | country-wide       |
| Sharma                      | 2007                | Surveillance of communicable diseases in tertiary health care system in Chandigarh, UT | Indian journal of medical sciences                                                          | India         | Chandigarh         |
| Ratnawati                   | 2008                | Enteric fever in endemic areas of Indonesia: an increasing problem of resistance       | Hasanuddin University, Makassar, Indonesia                                                  | Indonesia     | country-wide       |
| Thong                       | 2005                | Surveillance and Subtyping of Salmonella                                               | University of Malaysia                                                                      | Malaysia      | country-wide       |
| MOPH-THAILAND               | 2014                | Annual Report- Bureau of Epidemiology- Typhoid                                         | Ministry of Public Health                                                                   | Thailand      | country-wide       |
| MOPH-THAILAND               | 2014                | Annual Report- Bureau of Epidemiology- Paratyphoid                                     | Ministry of Public Health                                                                   | Thailand      | country-wide       |
| CDC-TAIWAN                  | 2006                | Statistics of communicable diseases and surveillance report in Taiwan area, 2004       | Centre for Disease Control Department of Health Executive Yuan                              | Taiwan, China | country-wide       |
| MOH-CAMBODIA                | 2007                | Annual Health Statistics Cambodia 2006                                                 | Department of Planning and Health Information                                               | Cambodia      | country-wide       |
| MOH-CAMBODIA                | 2008                | Annual Health Statistics Cambodia 2007                                                 | Department of Planning and Health Information                                               | Cambodia      | country-wide       |
| MOH-CAMBODIA                | 2009                | Annual Health Statistics Cambodia 2008                                                 | Department of Planning and Health Information                                               | Cambodia      | country-wide       |
| MOH-CAMBODIA                | 2010                | Annual Health Statistics Cambodia 2009                                                 | Department of Planning and Health Information                                               | Cambodia      | country-wide       |
| MOH-CAMBODIA                | 2011                | Annual Health Statistics Cambodia 2010                                                 | Department of Planning and Health Information                                               | Cambodia      | country-wide       |
| MOH-CAMBODIA                | 2012                | Annual Health Statistics Cambodia 2011                                                 | Department of Planning and Health Information                                               | Cambodia      | country-wide       |
| Hargreaves                  | 1995                | Annual report of the national notifiable diseases surveillance system, 1994            | Annual report of the National Notifiable Diseases Surveillance System                       | Australia     | country-wide       |
| Herceg                      | 1996                | Annual report of the national notifiable diseases surveillance system, 1995            | Annual report of the National Notifiable Diseases Surveillance System                       | Australia     | country-wide       |
| Curran                      | 1997                | Australia's notifiable diseases status, 1996                                           | Annual report of the National Notifiable Diseases Surveillance System                       | Australia     | country-wide       |
| Blumer                      | 2002                | Annual report of the national notifiable diseases surveillance system, 1994            | Annual report of the National Notifiable Diseases Surveillance System                       | Australia     | country-wide       |
| Begg                        | 2006                | Australia's notifiable diseases status, 2006                                           | Annual report of the National Notifiable Diseases Surveillance System                       | Australia     | country-wide       |
| Corvisy                     | 2013                | Australia's notifiable disease status, 2012                                            | Annual report of the National Notifiable Diseases Surveillance System                       | Australia     | country-wide       |
| MOH- NEW ZEALAND            | 2003                | Notifiable disease surveillance                                                        | New Zealand Public Health Surveillance Report                                               | New Zealand   | country-wide       |
| MOH- NEW ZEALAND            | 2004                | Notifiable disease surveillance                                                        | New Zealand Public Health Surveillance Report                                               | New Zealand   | country-wide       |
| MOH- NEW ZEALAND            | 2005                | Notifiable disease surveillance                                                        | New Zealand Public Health Surveillance Report                                               | New Zealand   | country-wide       |
| MOH- NEW ZEALAND            | 2007                | 2. Notifiable disease surveillance                                                     | New Zealand Public Health Surveillance Report                                               | New Zealand   | country-wide       |
| MOH- NEW ZEALAND            | 2008                | Notifiable disease surveillance                                                        | New Zealand Public Health Surveillance Report                                               | New Zealand   | country-wide       |
| MOH- NEW ZEALAND            | 2009                | Notifiable disease surveillance                                                        | New Zealand Public Health Surveillance Report                                               | New Zealand   | country-wide       |
| MOH- NEW ZEALAND            | 2010                | Notifiable disease surveillance                                                        | New Zealand Public Health Surveillance Report                                               | New Zealand   | country-wide       |
| MOH- NEW ZEALAND            | 2011                | Notifiable Disease Surveillance                                                        | New Zealand Public Health Surveillance Report                                               | New Zealand   | country-wide       |
| MOH- NEW ZEALAND            | 2012                | Outbreak surveillance                                                                  | New Zealand Public Health Surveillance Report                                               | New Zealand   | country-wide       |
| Ministerio De Salud Publica | 2013                | Anuario Estadistico de Salud                                                           | Ministerio de Salud Publica Dirreccion Nacional de Registro Medicos Y Estadisticas de Salud | Cuba          | country-wide       |
| Ministerio De Salud Publica | 2016                | Anuario Estadistico de Salud                                                           | Ministerio de Salud Publica Dirreccion Nacional de Registro Medicos Y Estadisticas de Salud | Cuba          | country-wide       |
| Robert Koch Institut        | 2001                | Infektionsepidemiologisches Jahrbuch meldepflichtiger Krankheiten für 2001             |                                                                                             | Germany       | country-wide       |
| Robert Koch Institut        | 2002                | Infektionsepidemiologisches Jahrbuch meldepflichtiger Krankheiten für 2002             |                                                                                             | Germany       | country-wide       |
| Robert Koch Institut        | 2003                | Infektionsepidemiologisches Jahrbuch meldepflichtiger Krankheiten für 2003             |                                                                                             | Germany       | country-wide       |
| Robert Koch Institut        | 2004                | Infektionsepidemiologisches Jahrbuch meldepflichtiger Krankheiten für 2004             |                                                                                             | Germany       | country-wide       |
| Robert Koch Institut        | 2005                | Infektionsepidemiologisches Jahrbuch meldepflichtiger Krankheiten für 2005             |                                                                                             | Germany       | country-wide       |
| Robert Koch Institut        | 2006                | Infektionsepidemiologisches Jahrbuch meldepflichtiger Krankheiten für 2006             |                                                                                             | Germany       | country-wide       |
| Robert Koch Institut        | 2007                | Infektionsepidemiologisches Jahrbuch meldepflichtiger Krankheiten für 2007             |                                                                                             | Germany       | country-wide       |

| Author                                         | Year of Publication | Title                                                                          | Journal                                                   | Country     | Level of reporting |
|------------------------------------------------|---------------------|--------------------------------------------------------------------------------|-----------------------------------------------------------|-------------|--------------------|
| Robert Koch Institut                           | 2008                | Infektionsepidemiologisches Jahrbuch meldepflichtiger Krankheiten für 2008     |                                                           | Germany     | country-wide       |
| Robert Koch Institut                           | 2009                | Infektionsepidemiologisches Jahrbuch meldepflichtiger Krankheiten für 2009     |                                                           | Germany     | country-wide       |
| Robert Koch Institut                           | 2010                | Infektionsepidemiologisches Jahrbuch meldepflichtiger Krankheiten für 2010     |                                                           | Germany     | country-wide       |
| Robert Koch Institut                           | 2011                | Infektionsepidemiologisches Jahrbuch meldepflichtiger Krankheiten für 2011     |                                                           | Germany     | country-wide       |
| Robert Koch Institut                           | 2012                | Infektionsepidemiologisches Jahrbuch meldepflichtiger Krankheiten für 2012     |                                                           | Germany     | country-wide       |
| Robert Koch Institut                           | 2013                | Infektionsepidemiologisches Jahrbuch meldepflichtiger Krankheiten für 2013     |                                                           | Germany     | country-wide       |
| Robert Koch Institut                           | 2014                | Infektionsepidemiologisches Jahrbuch meldepflichtiger Krankheiten für 2014     |                                                           | Germany     | country-wide       |
| Department of Health<br>EPIDEMIOLOGY<br>BUREAU | 2002                | The 2001 Philippines Health Statistics                                         |                                                           | Philippines | country-wide       |
| Department of Health<br>EPIDEMIOLOGY<br>BUREAU | 2012                | The 2011 Philippines Health Statistics                                         |                                                           | Philippines | country-wide       |
| Lutui                                          |                     | Typhoid fever in tonga                                                         |                                                           | Tonga       | Country-wide       |
| CDC -USA                                       | 2013                | Typhoid and Paratyphoid Fever Annual Summary 2013                              | Nationally Notifiable Disease Surveillance System (NNDSS) | USA         | Country-wide       |
| CDC -USA                                       | 2015                | Summary of Notifiable Infectious Diseases and Conditions — United States, 2013 | Morbidity and Mortality Weekly Report                     | USA         | Country-wide       |

Appendix 3.3: Included Conference Proceedings (Blood culture confirmed enteric fever)

| Author                | Year of Publication | Title                                                                                                                          | Journal                                                                               |
|-----------------------|---------------------|--------------------------------------------------------------------------------------------------------------------------------|---------------------------------------------------------------------------------------|
| Andrews,J             | 2015                | High rates of enteric fever diagnosis and low burden of disease in rural Nepal                                                 | Coalition Against Typhoid 9th Conference Proceedings.                                 |
| Levine,M              | 2013                | An Overview of iNTS.                                                                                                           | Coalition Against Typhoid 8th Conference Proceedings.                                 |
| Menezes, G.A., et al. | 2012                | Antimicrobial resistance trends in blood culture positive Salmonella Paratyphi A isolates from Pondicherry, India, 2005 - 2009 | International Journal of Infectious Diseases June 2012;16():e425 2012 June            |
| Rudiman, P.I., et al. | 2009                | The etiologies of acute undifferentiated febrile illness in an adult cohort in Bandung, Indonesia (2000-2008)                  | American Journal of Tropical Medicine and Hygiene November 2009;1():319 2009 November |
| Saha,S                | 2013                | Pediatric infection with typhoid fever in Bangladesh                                                                           | Coalition Against Typhoid 8th Conference Proceedings.                                 |
| Thompson, C           | 2015                | The growing burden of S. Paratyphi A in Kathmandu- epidemiological observations from a decade of clinical trials.              | Coalition Against Typhoid 9th Conference Proceedings.                                 |
