# Supplementary material for: Global Trends in Typhoidal Salmonellosis: A Systematic Review
Source: PubMed Central journal article supplement (PMC6128363; doi:10.4269/ajtmh.18-0034), 2018-07-25

Appendix 4: Typhoid and Paratyphoid  
Regional Incidence Trends (per 100, 000  
population) from Surveillance or the  
General Population

## Appendix 4.1: Typhoid Regional Incidence Trends (per 100, 000 population) – Europe and Central Asia

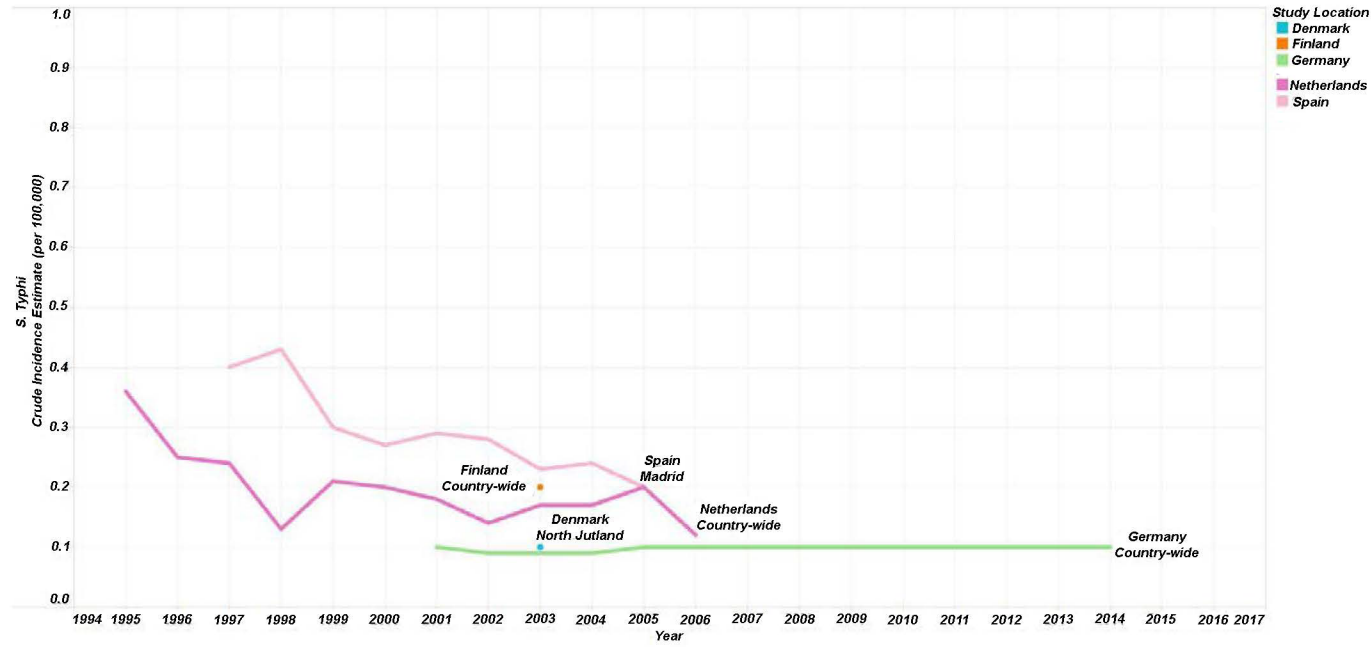

## Appendix 4.2: Typhoid Regional Incidence Trends (per 100, 000 population) – Latin America & the Caribbean

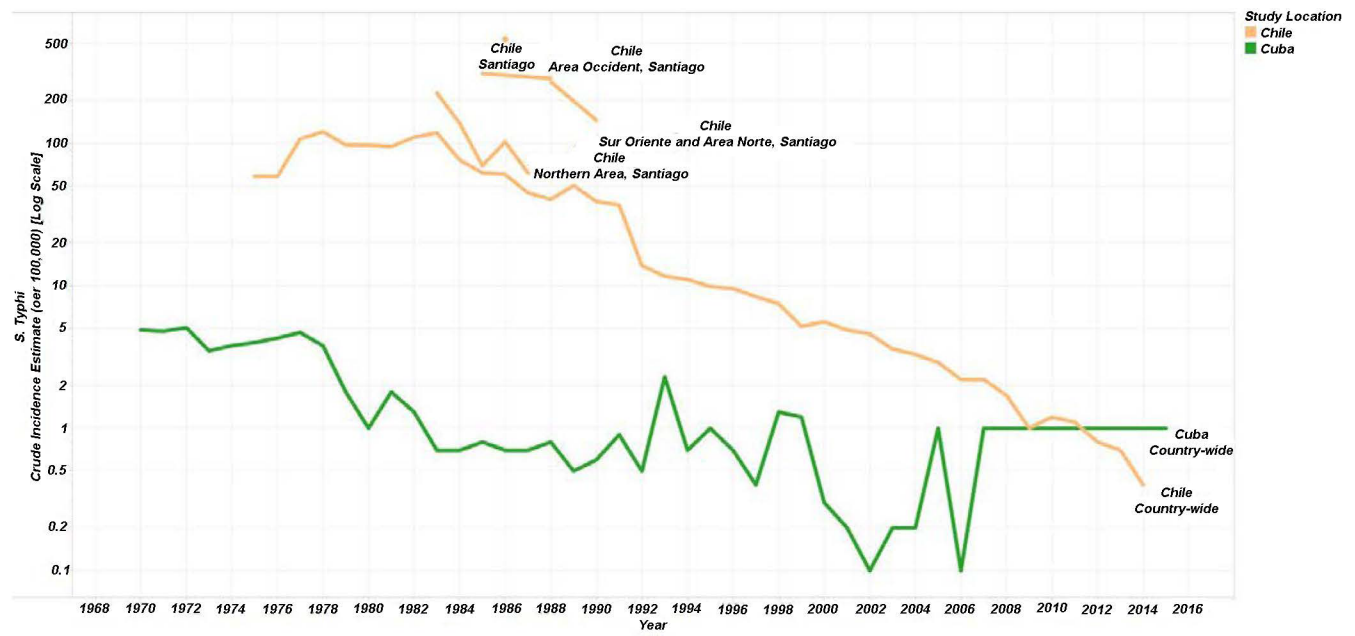

### Appendix 4.3: Typhoid Regional Incidence Trends (per 100, 000 population) – North America

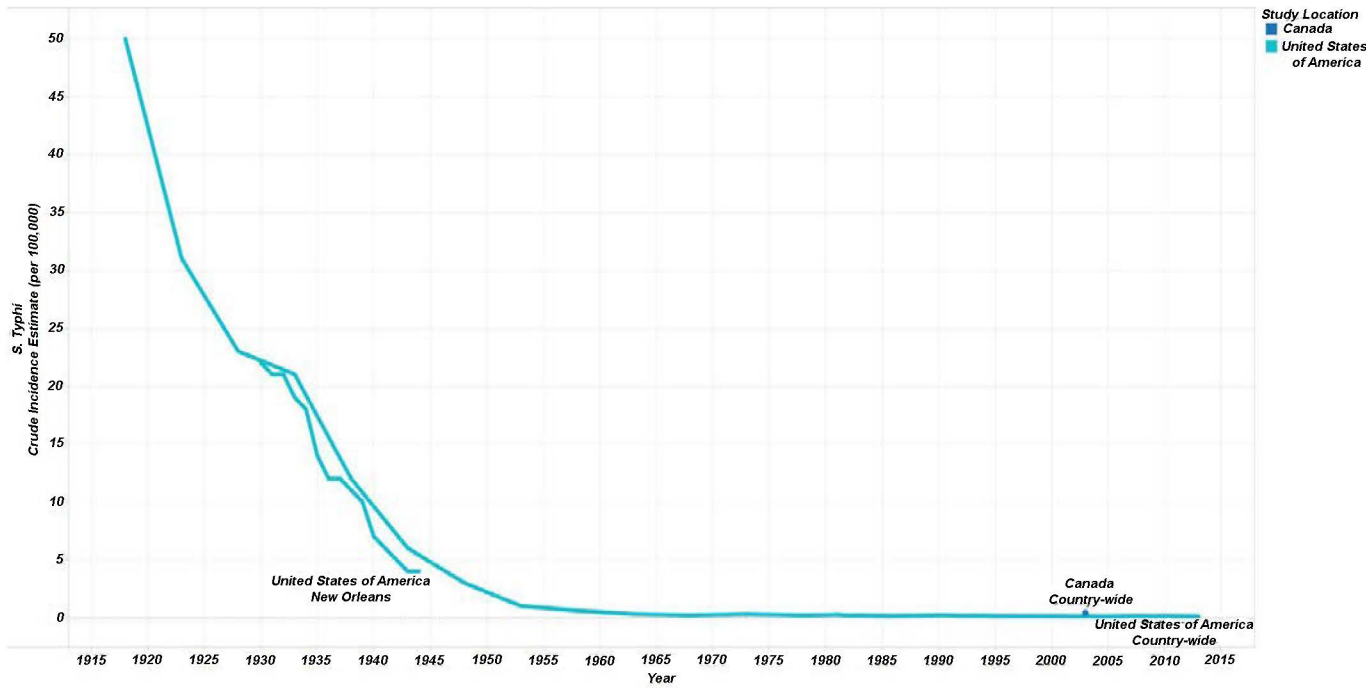

### Appendix 4.4: Paratyphoid Incidence Trends (per 100, 000 population) – All Regions

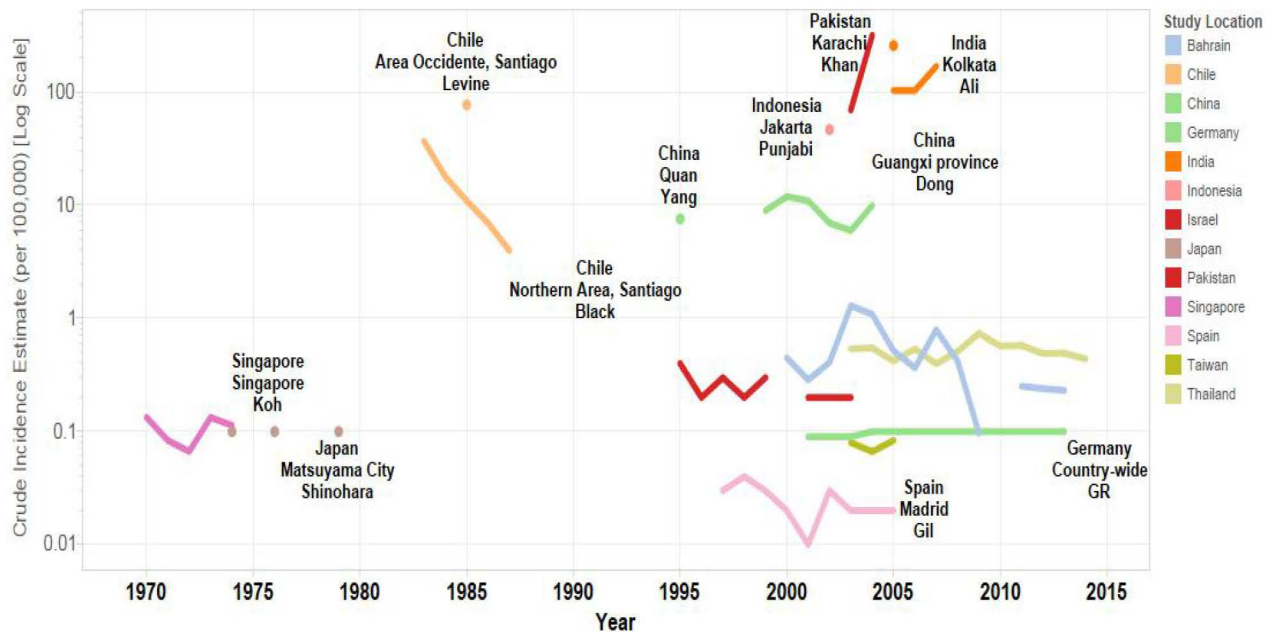

Supplement: tpmd180034.SD4.pdf [file tpmd180034.SD4.pdf]
