# Supplementary material for: Global Trends in Typhoidal Salmonellosis: A Systematic Review
Source: PubMed Central journal article supplement (PMC6128363; doi:10.4269/ajtmh.18-0034), 2018-07-25

## Appendix 5: Regional Prevalence's of Typhoid and Paratyphoid Fevers

## Appendix 5.1 South Asia S. Typhi Blood Culture Prevalence

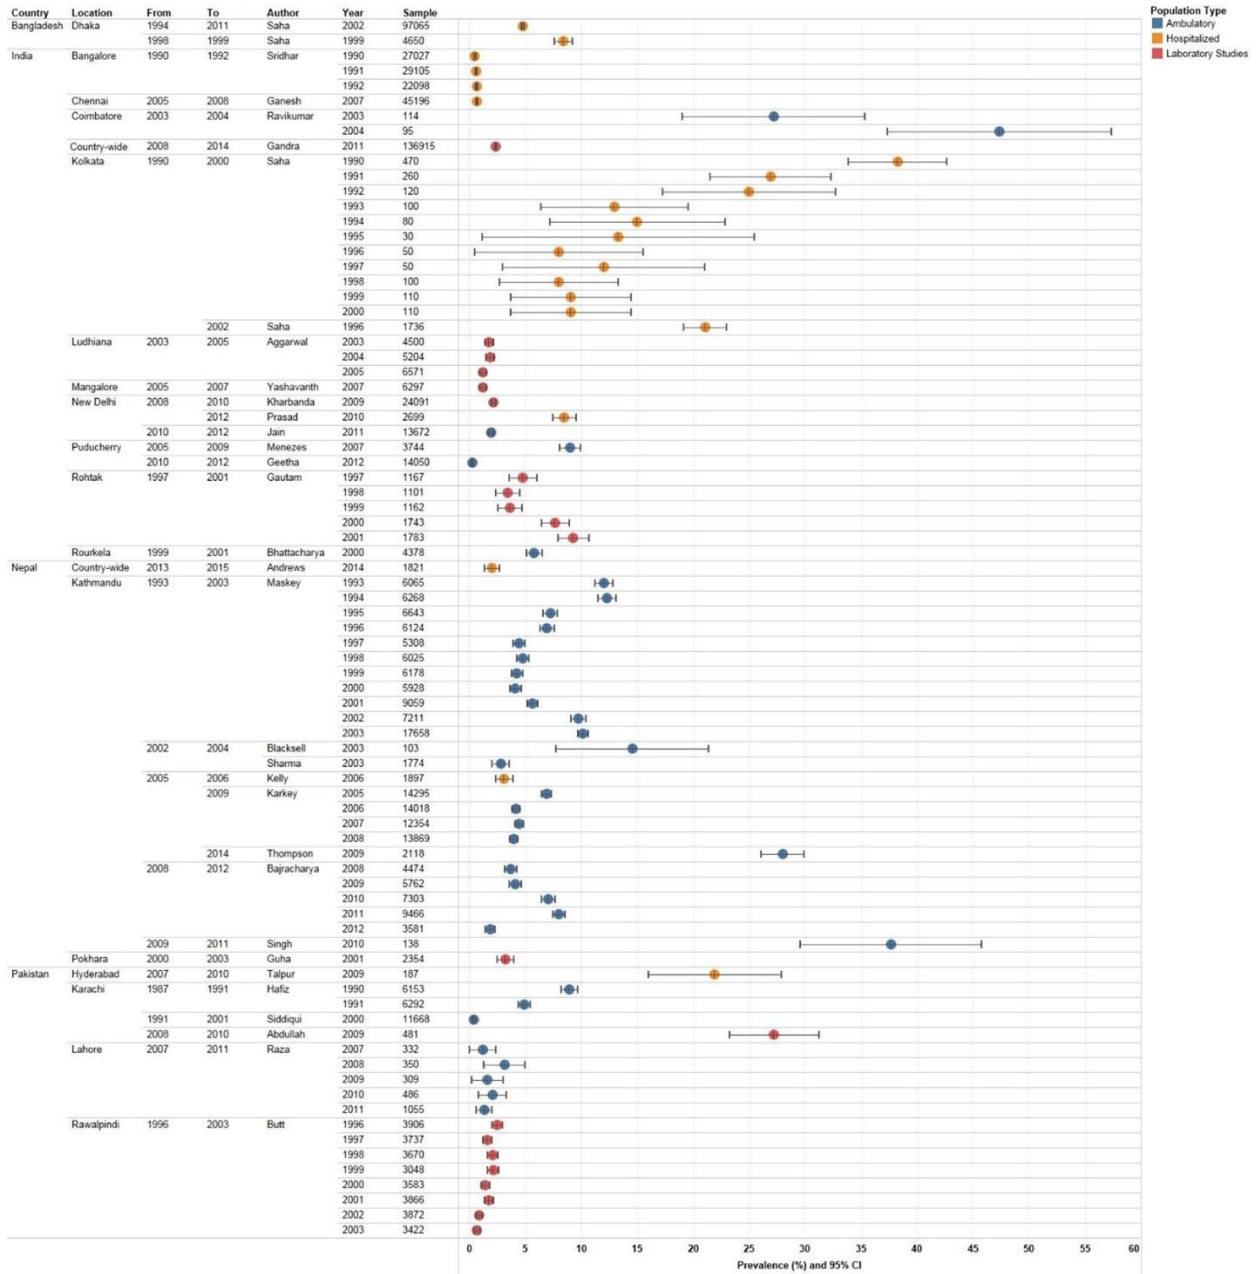

## Appendix 5.2 Sub-Saharan Africa S. Typhi Blood Culture Prevalence

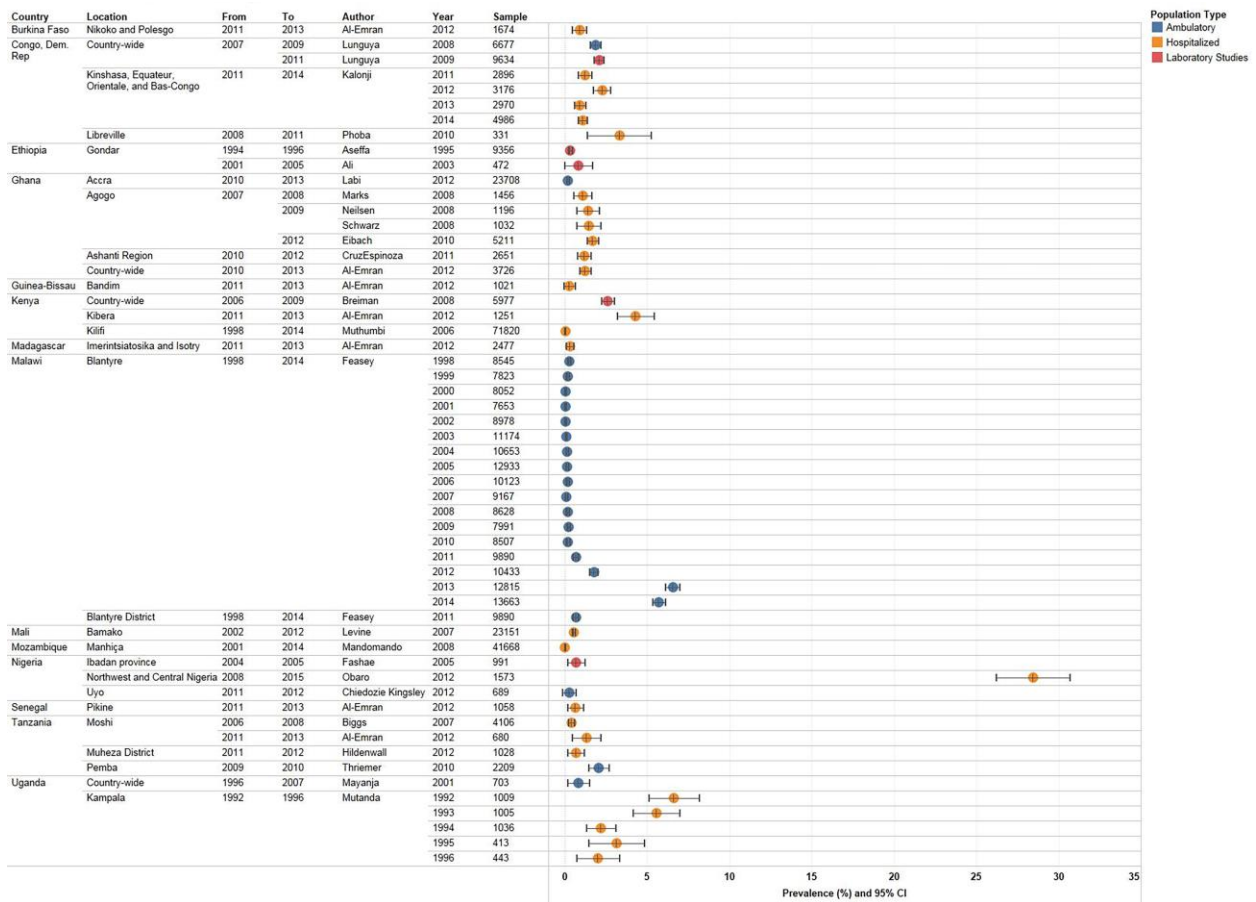

## Appendix 5.3 East Asia and Pacific S. Typhi Blood Culture Prevalence

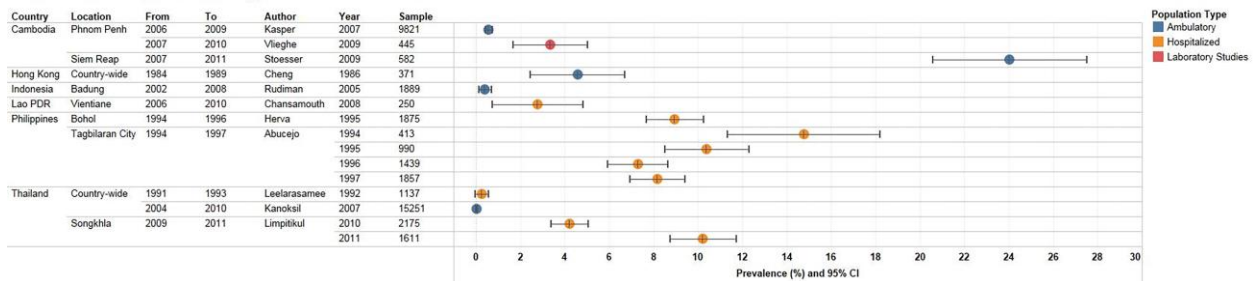

## Appendix 5.4 Middle East and North Africa S. Typhi Blood Culture Prevalence

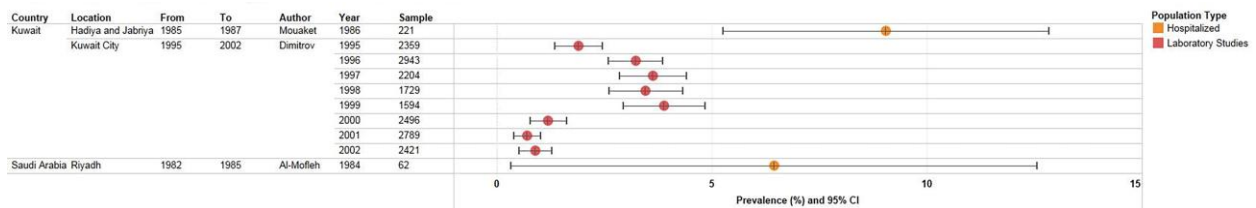

## Appendix 5.5 Europe and Central Asia S. Typhi Blood Culture

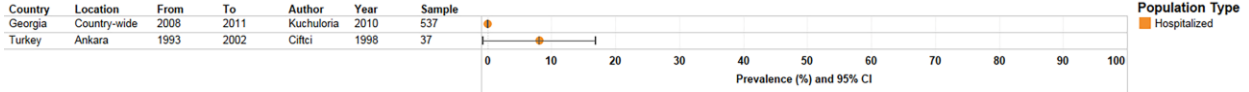

## Appendix 5.6 Paratyphoid Blood Culture Prevalence – all regions

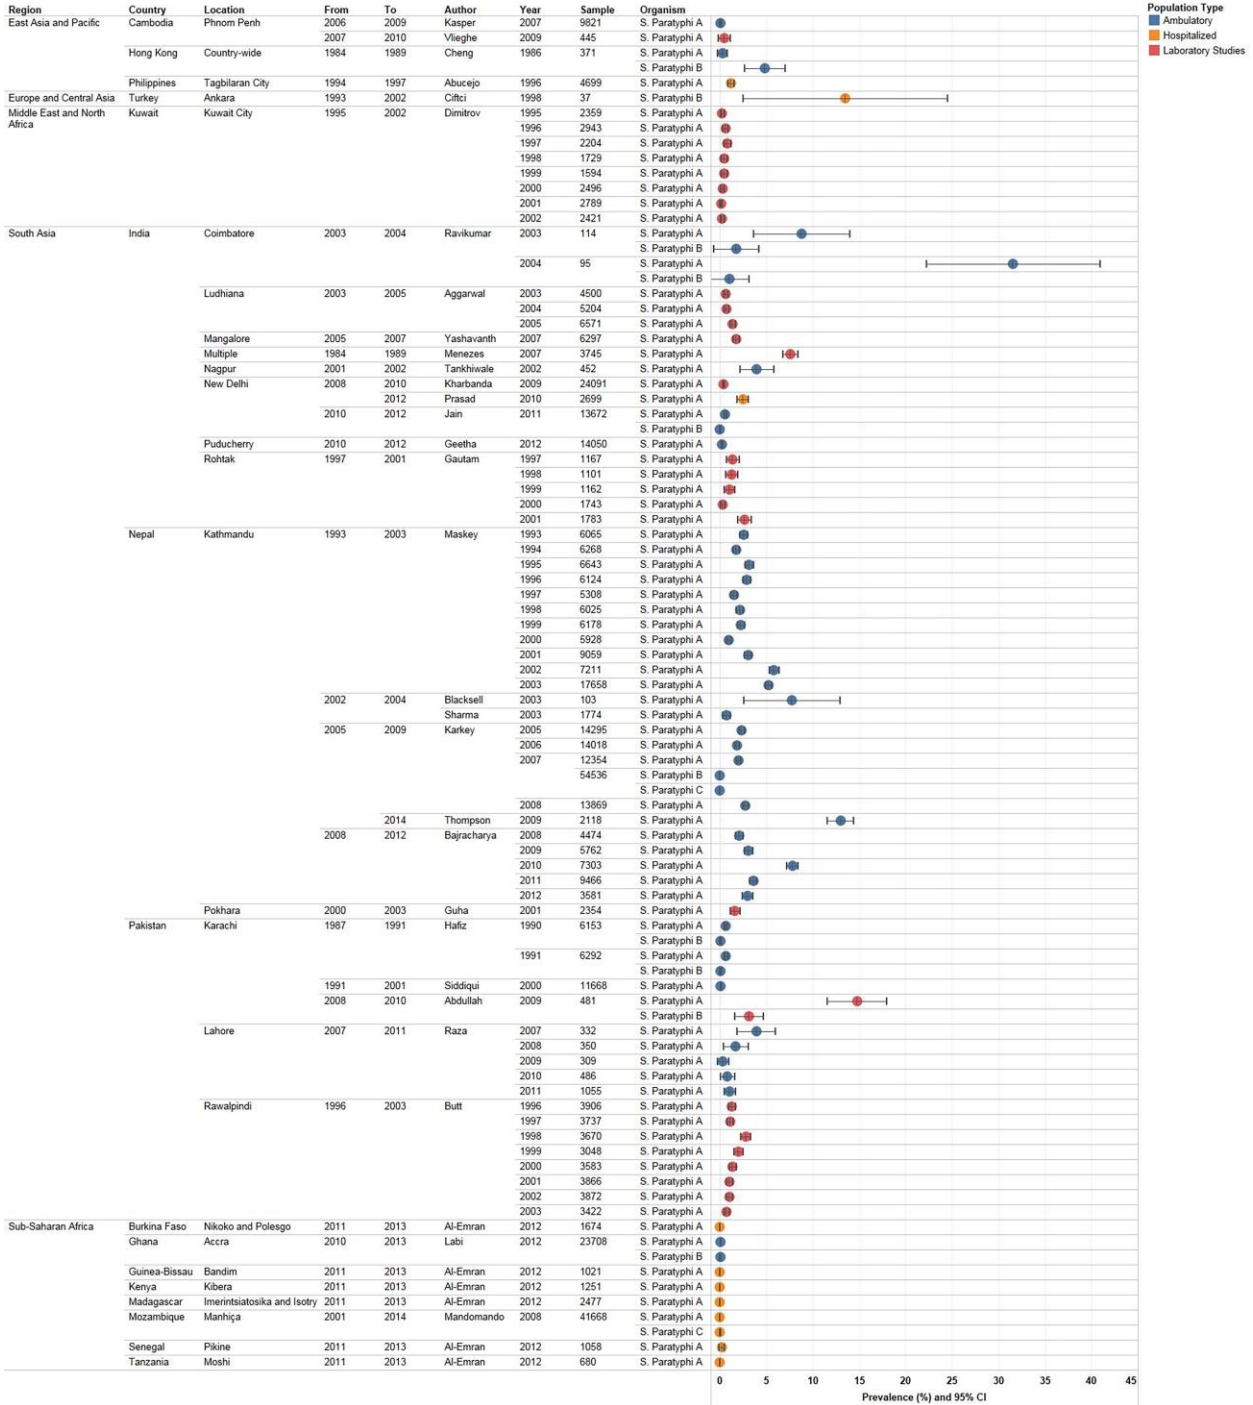

Supplement: tpmd180034.SD5.pdf [file tpmd180034.SD5.pdf]
