# Supplementary material for: Global Trends in Typhoidal Salmonellosis: A Systematic Review
Source: PubMed Central journal article supplement (PMC6128363; doi:10.4269/ajtmh.18-0034), 2018-07-25

## Appendix 6: Mortality and Morbidity Outcomes

### Appendix 6.1 Typhoid ileal perforation morbidity prevalence – all

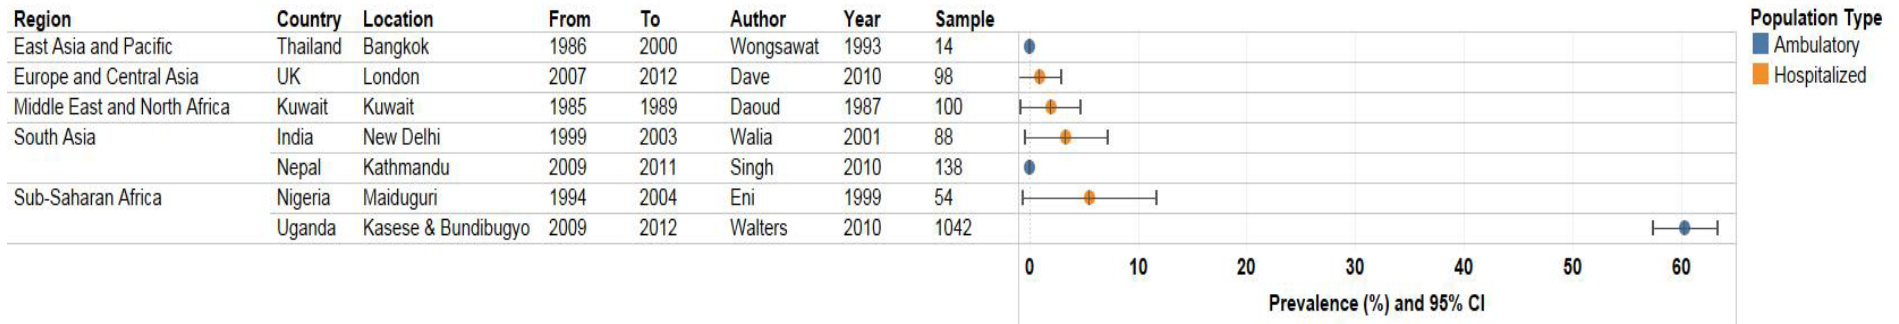

### Appendix 6.2 Typhoid ileal perforation case fatality rate – all regions

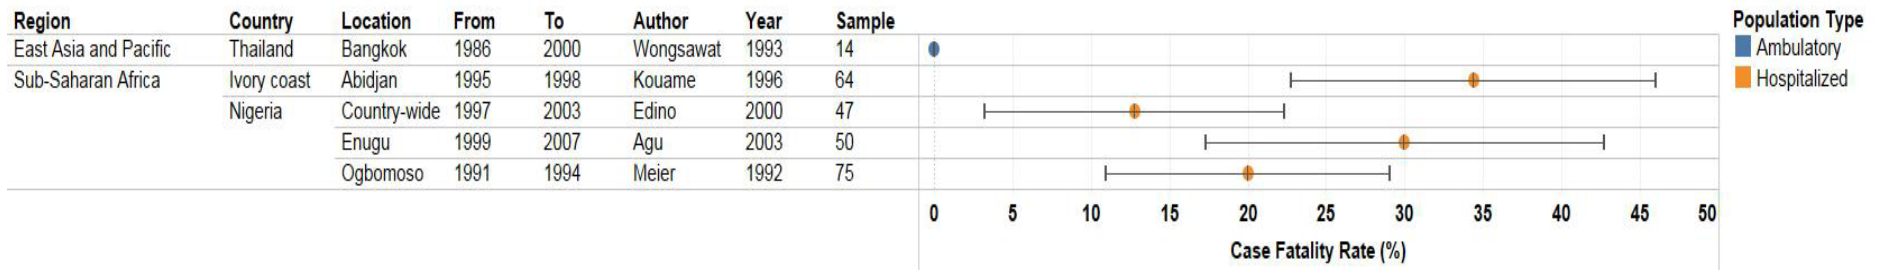

Supplement: tpmd180034.SD6.pdf [file tpmd180034.SD6.pdf]
